# Supplementary material for: Features of Tat Protein in HIV-1 Sub-Subtype A6 Variants Circulating in the Moscow Region, Russia
Source: MDPI journal article supplement (doi:10.3390/v15112212), 2023-11-04
Supplement: s1 [file s1]

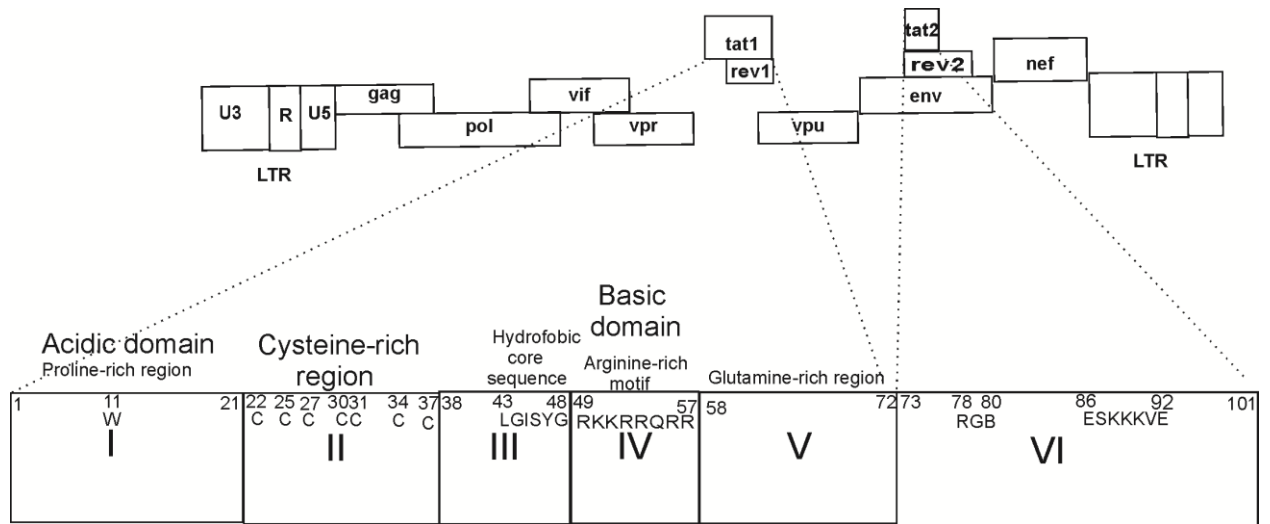

**Figure S1.** *tat* gene and functional domains of Tat protein. Tat is encoded by two exons. The first five domains are encoded by the first exon. I - first domain, proline-rich region: in 11 position - conserved tryptophan residue (W); II - second domain, cysteine-rich region: 7 highly conserved cysteine residues – in 22, 25, 27, 30, 31, 34 and 37 positions; III - third domain: contains hydrophobic core sequence <sup>43</sup>LGISYG<sup>48</sup>; IV - fourth domain, arginine-rich region, binds to the TAR element of HIV RNA; V - fifth domain, glutamine-rich region. The sixth domain is encoded by the second exon: contains <sup>78</sup>RGB<sup>80</sup> and <sup>86</sup>ESKKKVE<sup>92</sup> functionally significant motifs.

**Table S1.** The amino acid positions in Tat1-A6 with a statistically significant difference in the frequency of conservation between the sequences in the group of virus variants circulating in the Moscow Region and in the reference group (the sequences downloaded from the Los Alamos database).

| Amino acid* | Reference**<br>group<br>N=141<br>(100%) | Moscow Region<br>N=250<br>(100%) | <i>p</i>          |
|-------------|-----------------------------------------|----------------------------------|-------------------|
| 2D          | 140<br>(99.3%)                          | 225<br>(90%)                     | <b>0.0004</b>     |
| 7N          | 132<br>(93.6%)                          | 216<br>(86.4%)                   | 0.0285            |
| 21A         | 140<br>(99.3%)                          | 238<br>(95.2%)                   | 0.0303            |
| 23S         | 121<br>(85.8%)                          | 181<br>(72.4%)                   | <b>0.0024</b>     |
| 31C         | 129<br>(91.5%)                          | 197<br>(78.8%)                   | <b>0.0012</b>     |
| 47Y         | 141<br>(100%)                           | 239<br>(95.6%)                   | 0.0115            |
| 54H         | 89<br>(63.1%)                           | 108<br>(43.2%)                   | <b>0.0002</b>     |
| 57G         | 130<br>(92.2%)                          | 202<br>(80.8%)                   | <b>0.0025</b>     |
| 61S         | 119<br>(84.4%)                          | 172<br>(68.8%)                   | <b>0.0007</b>     |
| 62S         | 121<br>(85.8%)                          | 167<br>(66.8%)                   | <b>&lt;0.0001</b> |
| 68P         | 84<br>(59.6%)                           | 118<br>(47.2%)                   | 0.0187            |

\*- the amino acid in the reference sequence. Consensus sequence in reference group was used as a reference sequence; \*\* – the group of Tat1-A6 sequences downloaded from the HIV-1 Los Alamos Database ([www.hiv.lanl.gov](http://www.hiv.lanl.gov)). In bold: significant in the  $\chi^2$  test after Bonferroni correction  $p < 0.0045$

**Table S2.** Natural polymorphisms into Tat2 functionally significant motifs, <sup>78</sup>RGD<sup>80</sup> and <sup>86</sup>ESKKKVE<sup>92</sup>, in different clades\*.

| Domain  | Substitution | A6<br>N=205 | A1<br>N=236 | B<br>N=25<br>0 | C<br>N=250 | <i>p</i><br>A6-A1 | <i>p</i><br>A6-B  | <i>p</i><br>A6-C  |
|---------|--------------|-------------|-------------|----------------|------------|-------------------|-------------------|-------------------|
|         |              |             |             |                |            |                   |                   |                   |
| RGD     | R78Q         | 186         | 190         | 8              | 50         | <b>0.0025</b>     | <b>&lt;0.0001</b> | <b>&lt;0.0001</b> |
|         | R78P         | 3           | 22          | 2              | 5          | <b>0.0004</b>     | -                 | -                 |
|         | R78H         | 1           | 8           | 4              | 0          | 0.0316            | -                 | -                 |
|         | R78G         | 0           | 0           | 23             | 0          | -                 | <b>&lt;0.0001</b> | -                 |
|         | G79R         | 194         | 38          | 4              | 4          | <b>&lt;0.0001</b> | <b>&lt;0.0001</b> | <b>&lt;0.0001</b> |
|         | D80N         | 45          | 25          | 16             | 74         | <b>0.0011</b>     | <b>&lt;0.0001</b> | -                 |
|         | D80E         | 6           | 3           | 0              | 0          | -                 | 0.0065            | 0.0065            |
|         | D80V         | 1           | 94          | 0              | 2          | <b>&lt;0.0001</b> | -                 | -                 |
|         | D80I         | 0           | 57          | 0              | 2          | <b>&lt;0.0001</b> | -                 | -                 |
| ESKKKVE | E86K         | 15          | 10          | 16             | 5          | -                 | -                 | <b>0.0059</b>     |
|         | S87P         | 7           | 10          | 35             | 6          | -                 | <b>0.0001</b>     | -                 |
|         | S87Q         | 0           | 8           | 31             | 3          | 0.0078            | <b>&lt;0.0001</b> | -                 |
|         | K88Q         | 0           | 0           | 5              | 1          | -                 | 0.0418            | -                 |
|         | K88T         | 30          | 8           | 3              | 1          | <b>&lt;0.0001</b> | <b>&lt;0.0001</b> | <b>&lt;0.0001</b> |
|         | K88A         | 5           | 2           | 0              | 0          | -                 | 0.0130            | 0.0130            |
|         | K88E         | 16          | 7           | 17             | 1          | 0.0226            | -                 | <b>&lt;0.0001</b> |
|         | K89E         | 4           | 13          | 21             | 1          | -                 | <b>0.0027</b>     | -                 |
|         | K90E         | 5           | 17          | 18             | 13         | 0.0219            | 0.0211            | -                 |
|         | K90T         | 1           | 1           | 11             | 1          | -                 | 0.0096            | -                 |
|         | V91M         | 9           | 30          | 2              | 2          | <b>0.0021</b>     | 0.0131            | 0.0131            |

\***Note.** Amino acid substitutions were defined as the substitutions in the indicated positions in comparison with the consensus sequence of clade B. *p* values are given for the positions with *p* < 0.05, the positions with *p* ≥ 0.05 are marked “-”. In bold: significant in the  $\chi^2$  test with Bonferroni correction: A6-A1 *p* < 0.0042; A6-B *p* < 0.0036; A6-C *p* < 0.0062

**Table S3.** The amino acid positions in Tat2-A6 with statistically significant differences in the frequency of conservation between the sequences in the group of virus variants circulating in the Moscow Region and in the reference group (the sequences downloaded from the Los Alamos database).

| <b>Amino acid*</b> | <b>Reference group**<br/>N=205<br/>(100%)</b> | <b>Moscow Region<br/>N=189<br/>(100%)</b> | <b><i>p</i></b> |
|--------------------|-----------------------------------------------|-------------------------------------------|-----------------|
| 73P                | 187<br>(91.2%)                                | 186<br>(98.4%)                            | <b>0.0015</b>   |
| 86E                | 184<br>(89.8%)                                | 180<br>(95.2%)                            | 0.0404          |
| 97T                | 157<br>(76.6%)                                | 128<br>(67.7%)                            | 0.0495          |
| 101D               | 157<br>(76.6%)                                | 160<br>(84.6%)                            | 0.0436          |

\*- the amino acid in the reference sequence. Consensus sequence in reference group was used as a reference sequence; \*\* – the group of Tat2-A6 sequences downloaded from the HIV-1 Los Alamos Database ([www.hiv.lanl.gov](http://www.hiv.lanl.gov)). In bold: significant in the  $\chi^2$  test with Bonferroni correction  $p < 0.0125$
